# ***AmoA*-targeted polymerase chain reaction primers for the specific detection and quantification of comammox *Nitrospira* in the environment**

Petra Pjevac<sup>1</sup>, Clemens Schaubberger<sup>1§</sup>, Lianna Poghosyan<sup>2§</sup>, Craig W. Herbold<sup>1</sup>, Maartje A. H.J. van Kessel<sup>2</sup>, Anne Daebeler<sup>1</sup>, Michaela Steinberger<sup>1</sup>, Mike S. M. Jetten<sup>2</sup>, Sebastian Lücker<sup>2\*</sup>, Michael Wagner<sup>1</sup>, Holger Daims<sup>1\*</sup>

<sup>1</sup>Department of Microbiology and Ecosystem Science, Division of Microbial Ecology, Research Network 'Chemistry meets Microbiology', University of Vienna, Althanstrasse 14, 1090 Vienna Austria

<sup>2</sup>Department of Microbiology, IWW, Radboud University, Heyendaalseweg 135, 6525 AJ Nijmegen, the Netherlands

<sup>§</sup>These authors contributed equally to this study.

**\*Corresponding authors:** Holger Daims, Department of Microbiology and Ecosystem Science, Division of Microbial Ecology, Research Network 'Chemistry meets Microbiology', University of Vienna, Althanstrasse 14, 1090 Vienna, Austria. Phone: +43 1 4277 76604. E-mail: daims@microbial-ecology.net

Sebastian Lücker, Department of Microbiology, IWW, Radboud University, Heyendaalseweg 135, 6525 AJ Nijmegen, the Netherlands. Phone: +31 24 36 52564. E-mail: s.luecker@science.ru.nl

**Keywords:** nitrification, comammox, *Nitrospira*, *amoA*, marker gene, PCR

**Running title:** Comammox *amoA*-targeted PCR primers

## Abstract

Nitrification, the oxidation of ammonia via nitrite to nitrate, has always been considered to be catalyzed by the concerted activity of ammonia- and nitrite-oxidizing microorganisms. Only recently, complete ammonia oxidizers ('comammox'), which oxidize ammonia to nitrate on their own, were identified in the bacterial genus *Nitrospira*, previously known to contain only canonical nitrite oxidizers. *Nitrospira* are widespread in nature, but for assessments of the distribution and functional importance of comammox *Nitrospira* in ecosystems cultivation-independent tools to distinguish comammox from strictly nitrite-oxidizing *Nitrospira* are required. Here we developed new PCR primer sets that specifically target the *amoA* genes coding for subunit A of the distinct ammonia monooxygenase of comammox *Nitrospira*. While existing primers capture only a fraction of the known comammox *amoA* diversity, the new primer sets cover as much as 95% of the comammox *amoA* clade A and 92% of the clade B sequences in a reference database containing 326 comammox *amoA* genes with sequence information at the primer binding sites. Application of the primers to 13 samples from engineered systems (a groundwater well, drinking water treatment and wastewater treatment plants) and other habitats (rice paddy and forest soils, rice rhizosphere, brackish lake sediment and freshwater biofilm) detected comammox *Nitrospira* in all samples and revealed a considerable diversity of comammox in most habitats. Excellent primer specificity for comammox *amoA* was achieved by avoiding the use of highly degenerate primer preparations and by using equimolar mixtures of oligonucleotides that match existing comammox *amoA* genes. Quantitative PCR with these equimolar primer mixtures was highly sensitive and specific, and enabled the efficient quantification of clade A and clade B comammox *amoA* gene copy numbers in environmental samples. Thus, the new comammox *amoA*-targeted primers will enable more encompassing studies of nitrifying microorganisms in diverse ecosystems.

## Introduction

Nitrification is an essential process of the global biogeochemical nitrogen cycle and plays a pivotal role in biological wastewater treatment and in drinking water production. The recent discovery of the first complete ammonia oxidizers ('comammox') in the bacterial genus *Nitrospira* (Daims *et al.*, 2015; van Kessel *et al.*, 2015) was highly unexpected since *Nitrospira* were always regarded as canonical nitrite-oxidizing bacteria (NOB) (Watson *et al.*, 1986; Ehrich *et al.*, 1995; Spieck *et al.*, 2006; Lebedeva *et al.*, 2008; 2011). This discovery has raised the important questions of how commonly comammox *Nitrospira* occur in nitrifying microbial communities and how relevant they are for nitrification compared to ammonia-oxidizing bacteria (AOB), archaea (AOA), and NOB.

Members of the genus *Nitrospira* have been assigned to at least six sublineages (Daims *et al.*, 2001; Lebedeva *et al.*, 2008; 2011). They are widespread in virtually all oxic natural and engineered ecosystems, and an impressively high diversity of coexisting uncultured *Nitrospira* strains has been detected in wastewater treatment plants and soils (Pester *et al.*, 2014; Gruber-Dorninger *et al.*, 2015). All known comammox organisms belong to *Nitrospira* sublineage II (Daims *et al.*, 2015; van Kessel *et al.*, 2015; Pinto *et al.*, 2015; Palomo *et al.*, 2016). This sublineage contains also canonical NOB, which lack the genes for ammonia oxidation (Daims *et al.*, 2001, Koch *et al.*, 2015). Moreover, the known comammox *Nitrospira* do not form a monophyletic clade within *Nitrospira* lineage II in phylogenies based on 16S rRNA or *nrxB*, the gene encoding subunit beta of the functional key enzyme nitrite oxidoreductase. Instead, they mingle with the strict NOB in these phylogenetic trees (Daims *et al.*, 2015; van Kessel *et al.*, 2015; Pinto *et al.*, 2015). Finally, it remains unknown whether other *Nitrospira* sublineages (Daims *et al.*, 2001; Lebedeva *et al.*, 2008, 2011) also contain comammox members. Consequently, it is impossible to infer from 16S rRNA gene or *nrxB* phylogenies whether yet uncharacterized *Nitrospira* bacteria are comammox or strict NOB, although such attempts have been published (Gonzalez-Martinez *et al.*, 2016).

Intriguingly, comammox *Nitrospira* possess novel types of ammonia monooxygenase (AMO) and hydroxylamine oxidoreductase (HAO), the key enzymes of aerobic ammonia oxidation. The comammox AMO is phylogenetically distinct from the AMO forms of canonical AOB and

AOA (Daims *et al.*, 2015; van Kessel *et al.*, 2015). The *amoA* gene encoding AMO subunit A has become a widely used functional and phylogenetic marker gene for bacterial and archaeal ammonia oxidizers (Rotthauwe *et al.*, 1997; Purkhold *et al.*, 2000; Juniper *et al.*, 2008; Pester *et al.*, 2012). Public database mining for sequences related to the unique comammox *amoA* revealed the presence of putative comammox organisms in various environments including soils (paddy rice soils, other agricultural soils, forest soils, grassland soils), freshwater habitats (wetlands, rivers, lakes, groundwater basins), groundwater wells (GGWs), full-scale wastewater treatment plants (WWTPs), and drinking water treatment plants (DWTPs) (Daims *et al.*, 2015; van Kessel *et al.*, 2015). While this provides preliminary evidence of a broad habitat range of comammox organisms, current knowledge about the environmental distribution and abundance of comammox still is very limited.

The *amoA* genes of comammox *Nitrospira* form two monophyletic sister clades (Daims *et al.*, 2015; van Kessel *et al.*, 2015), which are referred to as clade A and clade B. Clade A also contains some genes that were previously assigned to the methanotroph *Crenothrix polyspora* (Stoecker *et al.*, 2006), but this assignment has recently been corrected (Oswald *et al.*, in revision). Established PCR primer sets specifically targeting the *amoA* genes of AOB or AOA (Sinigalliano *et al.*, 1995; Rotthauwe *et al.*, 1997; Juretschko *et al.*, 1998; Stephen *et al.*, 1999; Nold *et al.*, 2000; Norton *et al.*, 2002; Webster *et al.*, 2002; Okano *et al.*, 2004; Francis *et al.*, 2005; Treusch *et al.*, 2005; Mincer *et al.*, 2007; Juniper *et al.*, 2008; Meinhardt *et al.*, 2015) do not amplify any clade A and clade B comammox *amoA*. Co-amplification of some comammox *amoA* genes occurs with a primer set targeting both betaproteobacterial *amoA* and the A subunit of the particulate methane monooxygenase (*pmoA* of pMMO; Holmes *et al.*, 1995; Luesken *et al.*, 2011). These primers, however, only target a fraction of the known comammox *amoA* genes. A recently established two-step PCR protocol (Wang *et al.*, 2016) relies on the forward primer published by Holmes and colleagues (1995) and a new, highly degenerate reverse primer. It detects the bacterial copper-containing monooxygenase (CuMMO) genes including *pmoA*, betaproteobacterial *amoA*, and at least the comammox *amoA* genes that are amplified by the Holmes forward primer. However, because of its broad coverage of the CuMMOs, this primer pair does not

allow a specific detection or quantification by quantitative PCR (qPCR) of comammox *amoA* genes.

To enable the direct detection and quantification of comammox *amoA* genes in environmental samples, we designed in this study two new *amoA*-targeted primer sets specific for clade A or clade B comammox *amoA* genes, respectively. Subsequently, we applied these new primers to efficiently screen various habitats for the presence of comammox organisms and to rapidly quantify the abundances of comammox in selected samples.

## Materials and Methods

### *Database mining and sequence collection*

The amino acid sequences of bacterial AmoA and PmoA were extracted from publicly available metagenomic datasets stored in the Integrated Microbial Genomes databases (IMG-ER and -MER) using the functional profiler tool against a specific bacterial AmoA/PmoA pfam (PF02461). For characterization of comammox AmoA, betaproteobacterial AmoA, and PmoA, sequences collected from the Integrated Microbial Genomes databases were augmented with nearly full length amino acid sequences collected from the Pfam site and from NCBI Genbank as described in Daims *et al.* (2015). Collected sequences were filtered against a hidden Markov model (hmm) using hmmsearch (<http://hmmer.janelia.org/>) with the AmoA/PmoA hmm (PF02461) requiring an expect value of <0.0001, and clustered at 90% identity using USEARCH (Edgar, 2010). Cluster centroids were aligned using Mafft (Katoh *et al.*, 2002) and phylogenetic affiliation with comammox AmoA or betaproteobacterial AmoA was verified with phylogenetic trees calculated using FastTree (Prince *et al.*, 2009). Cluster centroids were expanded and reclustered at 99% identity with USEARCH and the phylogenetic affiliation with comammox and/or betaproteobacterial AmoA was re-assessed using FastTree.

## Phylogenetic analyses

For amino acid sequences that clustered with comammox AmoA and a selection of outgroup sequences affiliating with bacterial AmoA and PmoA, the corresponding nucleic acid sequences were recovered and aligned according to their amino acid translations using MUSCLE (Edgar, 2004). These nucleotide sequence alignments were manually corrected for frameshifts and used for calculating maximum likelihood trees with RaxmlHPC (Stamatakis *et al.*, 2005) using the GTRCAT approximation of rate heterogeneity and 1,000 bootstrap iterations. The generated reference tree was imported into the ARB software package (Ludwig *et al.*, 2004) and used as reference tree for the subsequent addition of short and nearly full-length comammox *amoA*, betaproteobacterial *amoA* and *pmoA* nucleotide sequences that were recovered from public databases. These sequences were added to the reference tree without changes of the overall tree topology by using the “parsimony interactive” tool of ARB.

## Primer design and PCR

Two degenerate PCR primer pairs (Table 1) targeting clade A or clade B comammox *amoA* genes, respectively, were designed and evaluated using the *amoA/pmoA* reference sequence dataset and the ‘probe design’ and ‘probe match’ functions of ARB (Ludwig *et al.*, 2004). The oligonucleotide primers were obtained from Biomers (Ulm, Germany).

The optimal annealing temperature for the primers was determined by temperature gradient PCR using total genomic DNA extracted by a phenol-chloroform based method (details below) from a GWW sample (Wolfenbüttel, Germany), which contained both clade A and clade B comammox *Nitrospira* (Daims *et al.*, 2015). An annealing temperature range from 42 to 52 °C was chosen for experimental evaluation based on the theoretical melting temperature of 48 °C of the designed primers (<http://biotools.nubic.northwestern.edu/OligoCalc.html>). Thermal cycling was carried out with an initial denaturation step at 94 °C for 5 min, which was followed by 25 cycles of denaturation at 94 °C for 30 s, primer annealing at 42 to 52 °C for 45 s, and elongation at 72 °C for 1 min. Cycling was completed by a final elongation step at 72 °C for 10 min. The

optimal annealing temperature for both primer pairs was found to be 52 °C. At lower annealing temperatures, unspecific amplification of DNA fragments shorter than the expected amplicon length (415 bp) was observed. Since the amplification efficiency of correctly sized amplicons was lower at 52 °C than at 48-50 °C, temperatures above 52 °C were not evaluated. The PCR reactions were performed in a DreamTaq Green PCR mix with 1× Dream Taq Green Buffer containing 2 mM MgCl<sub>2</sub>, 0.025 U DreamTaq DNA polymerase, 0.2 mM dNTPs, 0.5 µM primers and 0.1 mg/mL bovine serum albumin (Fermentas, Thermo Fischer Scientific, Waltham, MA, USA).

#### *Screening of environmental samples for comammox amoA*

Total nucleic acids were extracted from the environmental samples (Table 2) by using i) the Fast DNA SPIN Kit for soil (MP Biomedicals, Santa Ana, CA, USA), ii) the PowerSoil DNA Isolation Kit (MO BIO Laboratories, Carlsbad, CA, USA), or iii) a phenol-chloroform based total nucleic acid extraction protocol described by Angel *et al.*, (2012). PCRs were performed with either the DreamTaq Green PCR mix as described above, or with the PerfeCTa SYBR green FastMix PCR premix containing 1.5 mM of MgCl<sub>2</sub> (Quanta Bioscience, Beverly, MA, USA) and 0.1 µM primers. Amplicons of the expected length (415 bp) were purified by using the QIAquick PCR purification Kit (Qiagen, Hilden, Germany). Alternatively, the QIAquick Gel extraction Kit (Qiagen, Hilden, Germany) was used to purify PCR products of the correct length from agarose gels if additional, unspecific amplification products of different lengths were present. The purified PCR products were cloned in *E. coli* with the TOPO-TA cloning kit (Invitrogen, Karlsruhe, Germany) or the pGEM-T Easy Vector System (Promega, Mannheim, Germany) by following the manufacturer's instructions. PCR products obtained from cloned vector inserts from the TOPO-TA kit were Sanger-sequenced with the M13F primer at Microsynth (Balgach, Switzerland). For clones generated with the pGEM-TEasy Vector System, plasmids were extracted with the GeneJET plasmid miniprep kit (Thermo Fischer Scientific, Waltham, MA, USA) and the inserts were Sanger-sequenced with the M13F primer at Baseclear (Leiden, the Netherlands). The recovered sequences were quality checked and vector trimmed using the Sequencher version 4.6.1 (GeneCodes Corporation,

Ann Arbor, MI, USA) or the Chromas version 2.6.1 (Technelysium Pty Ltd, Brisbane, Australia) software packages, and were added as described above to the *amoA/pmoA* nucleotide sequence reference tree in ARB.

# *Quantitative PCR*

Quantification of comammox *amoA* genes was performed with individually prepared equimolar primer mixes for comammox *amoA* clade A and clade B genes (Table 1) on a selection of samples from different habitats (Table 3). Amplification of comammox *amoA* genes was performed with 3 min initial denaturation at 95 °C, followed by 45 cycles of 30 sec at 95 °C, 45 sec at 52 °C, and 1 min at 72 °C. Fluorescence was measured at 72 °C for amplicon quantification. After amplification, an amplicon melting curve was recorded in 0.5 °C steps between 38 and 96 °C. All qPCR assays were performed on a Bio-Rad C1000 CFX96 Real-Time PCR system (Bio-Rad, Hercules, CA, USA) in Bio-Rad iQ SYBR Green Supermix (Bio-Rad, Hercules, CA, USA), containing 50 U/ml iTaq DNA polymerase, 0.4 mM dNTPs, 100 mM KCl, 40 mM Tris-HCl, 6 mM MgCl<sub>2</sub>, 20 mM fluorescein, and stabilizers. The respective equimolar primer mixtures (Table 1) were added to a final concentration of 0.5 µM. Environmental DNA samples were added to each PCR reaction to a final volume of 20 µl reaction mix. Different template DNA dilutions (10x to 10,000x) resulting in DNA concentrations from 0.004 to 24 ng were applied to minimize possible PCR inhibition caused by excess DNA or co-extracted substances.

All assays were performed in triplicate. For each assay, triplicate standard series were generated by tenfold serial dilutions (10<sup>1</sup>-10<sup>8</sup> gene copies/µl) from purified M13-PCR products obtained from cloned vector inserts generated with the TOPO-TA cloning kit as described above. Clones of comammox *amoA* genes used for standard curve generation originated from this study. The correlation coefficient (r<sup>2</sup>) for each of the external standard curves was ≥0.998. The amplification efficiency for comammox *amoA* clade A and clade B genes was 88.5% and 87.0%, respectively.

## Results and Discussion

### *Design and evaluation of comammox amoA-specific PCR primers*

A principal goal of this study was to develop a specific *amoA*-targeted PCR assay for the efficient and cultivation-independent detection and quantification of comammox *Nitrospira* in environmental samples. Mining of public databases retrieved only a small number (376) of sequences related to clade A or clade B comammox *amoA*, and only 32 of these sequences cover almost the full length of the comammox *amoA* genes (840-846 bp for clade A, 885-909 bp for clade B according to the available genomic and metagenomic datasets from comammox *Nitrospira*). To achieve a good coverage of the known comammox *amoA* gene diversity, primer design was restricted to the range of aligned nucleotide positions for which sequence information exists in at least 80% of the publicly available comammox *amoA* sequences. Furthermore, availability of sequence information for at least one of the primer binding sites in the great majority of betaproteobacterial *amoA* gene sequences (14,000/14,019) and bacterial *pmoA* gene sequences (9,913/10,289) facilitated the design of highly comammox *amoA*-specific primers. Two degenerate primer pairs (ComaA-244F/659R and ComaB-244F/659R) targeted 95% and 83% of the *amoA* gene sequences from comammox clade A or B, respectively (Table 1). *In silico* analyses confirmed that each primer contained at least 4 mismatches to all sequences within the respective other comammox *amoA* clade. Furthermore, at least 3 mismatches to almost all sequences affiliated with betaproteobacterial *amoA* and with *pmoA* genes were present. Merely 23 out of 14,019 betaproteobacterial *amoA* had only two mismatches to the comammox *amoA* clade A-targeted primers. Further, only 22 and 2 out of 9,913 *pmoA* gene sequences showed only two mismatches to the comammox *amoA* clade A- and clade B-targeted primers, respectively. No betaproteobacterial *amoA* and no *pmoA* gene sequences had less than two mismatches to any of the comammox *amoA*-targeted primer pairs.

The new primer sets were first evaluated with a pasty iron sludge sample from the GWW Wolfenbüttel, which was known to harbor both clade A and clade B comammox *Nitrospira* according to a previous metagenomic analysis (Daims *et al.*, 2015). A single amplicon of the expected length (415 bp) was obtained from this sample with both primer pairs after PCR

with an annealing temperature of 52 °C. Cloning and sequencing of the PCR products exclusively retrieved sequences of comammox *amoA* from clade A or clade B, respectively (Fig. 1). After application of the two primer sets to 12 additional samples from various environments, comammox *amoA* clade A was detected in 11 samples and clade B in 7 samples (see below and Table 2). Single, correctly sized amplicons were obtained from the majority of samples (8 of the clade A-positive samples and 6 of the clade B-positive samples, Table 2). In the remaining cases, unspecific PCR products of different lengths were observed in addition to the expected *amoA* amplicons. These unspecific PCR products appeared irrespectively of the applied DNA extraction method and the number of PCR cycles, but were overcome by either purifying the target *amoA* amplicon by agarose gel excision (for the lake Herrensee sample) or by a PCR-based clone screening for the right insert size after cloning (for the remaining samples with unspecific PCR products). In summary, we retrieved 444 comammox *amoA* gene sequences in this study by PCR, cloning and sequencing from the 13 environmental samples (Table 2). Only two of the 446 CuMMO sequences did not cluster with comammox *amoA* clades, but were classified as *pmoA*. Furthermore, one sequence obtained with the comammox *amoA* clade A-targeted primers turned out to be affiliated with comammox *amoA* clade B. Thus, the degenerate comammox *amoA*-targeted primers offer a straightforward, fast and robust approach for the detection and identification of comammox *Nitrospira* in complex samples. Notably, with an amplicon size of 415 bp the primers are also suitable for high-throughput amplicon sequencing by current Illumina technologies.

Since amplification of non-target DNA was observed with some samples, we took into account that primer degeneracy may impair PCR specificity (Linhart and Shamir, 2002). Furthermore, primer degeneracy can cause an uneven amplification of different sequence variants (Polz and Cavanaugh, 1998). In general, less degenerate, defined primer mixtures can reduce unspecific primer binding and yield cleaner amplification products from complex environmental samples (Linhart and Shamir, 2002). This is of particular importance for obtaining correct population size estimates in qPCR assays. Consequently, less degenerate primer mixtures consisting of separately synthesized versions of the respective forward and

reverse primer, with each primer version containing only one or no base ambiguity (Table 1), were also tested. All selected primer versions in these mixtures matched real comammox *amoA* gene sequences in our database. In contrast, the original (more degenerate) primer sets inevitably contained also co-synthesized oligonucleotide versions that did not match any known target comammox *amoA* sequence. The less degenerate mixtures offered the same coverage of comammox *amoA* clade A (95%), and by adding one additional oligonucleotide to the forward primer mix we even increased the coverage of comammox *amoA* clade B from 83 to 92%. Considerably improved PCR results were achieved by applying these primer mixtures to the samples prone to unspecific amplification, as only amplicons of the expected size were obtained after PCR (data now shown). Based on their improved specificity and the higher coverage of comammox *amoA* clade B, the use of the defined, manually pooled equimolar primer mixtures (Table 1) is recommended. For comammox *amoA*-targeted qPCR experiments that use the primer sets presented here, application of the less degenerate, equimolar primer mixtures is mandatory.

#### *Environmental detection and diversity of comammox Nitrospira*

Intriguingly, comammox *amoA* genes were detected in all samples (Table 2) encompassing forest soil, rice paddy soils and rice rhizosphere, a freshwater biofilm and brackish lake sediment, as well as WWTPs and DWTPs. After cloning and sequencing, the obtained *amoA* sequences were clustered in operational taxonomic units (OTUs) based on a sequence identity threshold of 95% (Francis *et al.*, 2003). It should be noted that these OTUs might not delineate species, as an appropriate species-level sequence identity cutoff for comammox *amoA* remains unknown. This would need to be determined by correlating *amoA* sequence identities with 16S rRNA identities or with genome-wide average nucleotide identities (Purkhold *et al.*, 2000; Richter and Roselló-Mora, 2009; Pester *et al.*, 2014) once more genomic data from comammox *Nitrospira* become available. A phylogenetic analysis of the *amoA* gene OTU representatives revealed a substantial diversity of comammox *Nitrospira* in almost all samples (Fig. 1, Table 2, Table S1). Both clade A and clade B comammox *Nitrospira* were detected in seven samples. Only clade A members were found in the

WWTPs, the brackish lake sediment, and the river biofilm enrichment, whereas we retrieved only clade B *amoA* gene sequences from the forest soil (Table 2). The widespread occurrence of comammox *Nitrospira* in the analyzed samples is consistent with the previously reported presence of mostly uncultured and uncharacterized *Nitrospira* members in the respective habitat types (e.g. Daims *et al.*, 2001; Martiny *et al.*, 2005; Ke *et al.*, 2013; Pester *et al.*, 2014). Future studies should determine which fraction of these environmental *Nitrospira* are strict NOB or comammox, respectively. The presence of multiple comammox OTUs, and in particular the co-occurrence of both clade A and clade B comammox, in several samples (Table 2) indicates ecological niche partitioning that enables the coexistence of different comammox strains. For co-occurring *Nitrospira* in WWTPs, niche partitioning based on the preferred nitrite concentrations, on the capability to utilize formate as an alternative substrate, and on the tendency to co-aggregate with AOB has already been demonstrated (Maixner *et al.*, 2006; Gruber-Dorninger *et al.*, 2015). It is tempting to speculate that underlying mechanisms of niche differentiation of comammox *Nitrospira* could also be different substrate (ammonia) concentration optima and alternative energy metabolisms, such as the oxidation of formate and of hydrogen (Koch *et al.*, 2014; Koch *et al.*, 2015).

#### Quantification of comammox *amoA* genes by quantitative PCR

Since the discovery of AOA (Könneke *et al.*, 2005), numerous studies compared the abundances of AOB and AOA, and tried to assess the contributions of different groups of ammonia oxidizers to nitrification, in various engineered and natural environments (e.g. Leininger *et al.*, 2006; Chen *et al.*, 2008; Jia and Conrad, 2009; Mussmann *et al.*, 2011; Daebeler *et al.*, 2012; Ke *et al.*, 2013; Bollmann *et al.*, 2014). To adequately investigate the niche differentiation and labor partitioning between ammonia oxidizers, it will be necessary to include comammox *Nitrospira* in such comparisons. This will require a robust method for the rapid and accurate quantification of comammox *Nitrospira*. Thus, we established qPCR assays using the equimolar primer mixtures that target comammox *amoA* clade A or clade B, respectively. Both assays had a high efficiency, accuracy and sensitivity, as the

quantification of as few as ten copies of comammox *amoA* standards was achieved (Supplementary Figure 1).

As proof of applicability, we quantified comammox *amoA* clade A and clade B genes in five different sample types: one activated sludge sample (WWTP VetMed, Vienna); paddy rice soil from Vercelli, Italy; beech forest soil from Klausen-Leopoldsdorf, Austria; pasty iron sludge from the riser pipe of GWW Wolfenbüttel, Germany; and the trickling filter sample from the DWTP Friedrichshof, Germany (Table 3). Melting curve analyses confirmed the specificity of both assays (Supplementary Figure 2). Amplification of non-target DNA occurred only in those samples that lacked the respective target organisms of the primers according to the aforementioned results of the end point PCR (i.e., WWTP VetMed for clade B and Klausen-Leopoldsdorf forest soil for clade A comammox) and was easily detectable based on a distinct slope of the melting curves of the unspecific amplicons (Supplementary Figure 2). The abundances of clade A and clade B comammox *amoA* were in the same order of magnitude in the samples containing both groups (Table 3).

### Summary and Outlook

The newly developed primer sets were designed for maximal coverage of the known comammox *Nitrospira* lineages, high specificity for comammox *amoA* genes, and a broad range of applications including high-throughput amplicon sequencing and qPCR. By using these primer sets, we detected the presence of comammox *Nitrospira* in a variety of habitats. In this methodological study, our primary goal was to evaluate the applicability of the newly designed primers for end point PCR and for qPCR with a selection of different sample types. A much broader census of comammox *Nitrospira* in the environment is needed before general conclusions on their distribution and importance for nitrification can be drawn. However, as was previously shown for AOA in a WWTP (Mussmann *et al.*, 2011), high *amoA* gene copy numbers do not always indicate that the respective population is functionally important for ammonia oxidation. Aside from the possibility that abundant putative nitrifiers grow on alternative substrates, one can also not exclude *amoA* gene quantification biases caused by extracellular DNA, which may for example be secreted to a

different extent by the phylogenetically diverse nitrifiers. Moreover, at least in AOA a basal *amoA* transcription can occur even in the absence of detectable ammonia-oxidizing activity (Mussmann *et al.*, 2011; Ke *et al.*, 2013). In contrast, pronounced shifts in the *amoA* transcription levels upon certain environmental stimuli, such as a changing availability of ammonium, likely are useful activity indicators for AOA, AOB, and comammox *Nitrospira*. Although not tested yet in this context, the new comammox *amoA*-specific primers should in principle be suitable for reverse transcription-qPCR of *amoA* and should thus allow the quantification of comammox *amoA* transcripts in environmental samples and during incubation experiments. Thus, the primers can serve as a tool for a broad range of study designs to elucidate the ecological significance of comammox *Nitrospira* in comparison to other ammonia oxidizers.

## Acknowledgments

The authors would like to thank Bernd Bendinger, Kay Bouts, Stephanie Eichorst, Mohammad Ghashghavi, Hannes Schmidt, Jasmin Schwarz, Annika Vaksmaa, Weren de Vet, Julia Vierheilig, Dagmar Woebken, and Thomas Zechmeister for providing sample material. Bela Hausmann and Roey Angel are acknowledged for valuable discussion and advice with the qPCR assay setup. This research was supported by the Austrian Science Fund (FWF) projects P27319-B21 and P25231-B21 to H.D., the Netherlands Organization for Scientific Research (NWO VENI grant 863.14.019) to S.L., European Research Council Advanced Grant projects NITRICARE 294343 to M.W. and Eco\_MoM 339880 to M.S.M.J., the Technology Foundation STW (grant 13146) and the Netherlands Earth System Science Centre (NESSC), and through financing from the Ministry of Education, Culture and Science (OCW) of The Netherlands. The Radboud Excellence Initiative is acknowledged for support to S.L.

## Figures and Tables

**Table 1.** Comammox *amoA*-targeted primers designed in this study, and *in silico* evaluation of the primer coverage of the target clades in our comammox *amoA* reference sequence database.

**Table 2.** Environmental samples analyzed in this study, PCR amplification cycles, and numbers of cloned comammox *amoA* sequences and OTUs retrieved from each sample.

**Table 3.** Copy numbers of comammox *amoA* genes in environmental samples as determined by qPCR analysis.

**Figure 1.** Maximum likelihood tree showing the phylogenetic affiliation of the comammox *amoA* genes obtained in this study (printed in boldface) to reference *amoA* sequences from comammox clades A and B. One representative sequence from each OTU is shown. Identifiers of clones (in parentheses) and of OTUs are indicated. Previously described comammox *Nitrospira* strains are shown in red. The outgroup consisted of selected betaproteobacterial *amoA* and proteobacterial *pmoA* genes. The scale bar indicates estimated change per nucleotide.

## References

- Angel R, Claus P, Conrad R. Methanogenic archaea are globally ubiquitous in aerated soils and become active under wet anoxic conditions. *ISME J.* 2012; 6: 847-862.
- Bollmann A, Bullerjahn GS, McKay RM. Abundance and diversity of ammonia-oxidizing archaea and bacteria in sediments of trophic end members of the Laurentian Great Lakes, Erie and Superior. *PLoS One.* 2014; 9: e97068.
- Chen X., Zhu YG, Xia Y, Shen JP, He JZ. Ammonia-oxidizing archaea: important players in paddy rhizosphere soil?. *Environ Microbiol.* 2008; 10: 1978-1987.

422 Daebeler A, Abell GC, Bodelier PL, Bodrossy L, Frampton DM, Hefting MM, et al. Archaeal  
423 dominated ammonia-oxidizing communities in Icelandic grassland soils are moderately  
424 affected by long-term N fertilization and geothermal heating. *Front Microbiol.* 2012; 3: 352.  
425 Doi: 10.3389/fmicb.2012.00352

426 Daims H, Nielsen JL, Nielsen PH, Schleifer KH, Wagner M. In Situ Characterization of  
427 *Nitrospira*-Like Nitrite-Oxidizing Bacteria Active in Wastewater Treatment Plants. *Appl*  
428 *Environ Microbiol.* 2001; 67: 5273-5284.

429 Daims H, Lebedeva EV, Pjevac P, Han P, Herbold C, Albertsen M, et al. Complete  
430 nitrification by *Nitrospira* bacteria. *Nature.* 2015; 528: 504-509.

431 Edgar RC. MUSCLE: multiple sequence alignment with high accuracy and high throughput.  
432 *Nucleic Acids Res.* 2004; 32: 1792-1797.

433 Edgar RC. Search and clustering orders of magnitude faster than BLAST. *Bioinformatics.*  
434 2010; 26: 2460-2461.

435 Ehrich S, Behrens D, Lebedeva E, Ludwig W, Bock E. A new obligately  
436 chemolithoautotrophic, nitrite-oxidizing bacterium, *Nitrospira moscoviensis* sp. nov. and its  
437 phylogenetic relationship. *Arch Microbiol.* 1995; 164: 16-23.

438 Francis CA, O'Mullan GD, Ward BB. Diversity of ammonia monooxygenase (*amoA*) genes  
439 across environmental gradients in Chesapeake Bay sediments. *Geobiology.* 2003; 1: 129-  
440 140.

441 Francis CA, Roberts KJ, Beman JM, Santoro AE, Oakley BB. Ubiquity and diversity of  
442 ammonia-oxidizing archaea in water columns and sediments of the ocean. *Proc Nat Acad*  
443 *Sci USA.* 2005; 102: 14683-14688.

444 Gruber-Dorninger C, Pester M, Kitzinger K, Savio DF, Loy A, Rattei, T., et al. Functionally  
445 relevant diversity of closely related *Nitrospira* in activated sludge. *ISMEJ.* 2015; 9: 643-655.

446 Gonzalez-Martinez A, Rodriguez-Sanchez A, van Loosdrecht MM, Gonzalez-Lopez J,  
447 Vahala R. Detection of comammox bacteria in full-scale wastewater treatment bioreactors  
448 using tag-454-pyrosequencing. Environ Sci Pollut R. 2016; 23: 25501-25511.

449 Holmes AJ, Costello A, Lidstrom ME, Murrell JC. Evidence that participate methane  
450 monooxygenase and ammonia monooxygenase may be evolutionarily related. FEMS  
451 Microbiol Lett. 1995; 132: 203-208.

452 Jia Z, Conrad R. Bacteria rather than Archaea dominate microbial ammonia oxidation in an  
453 agricultural soil. Environ Microbiol. 2009; 11: 1658-1671.

454 Junier P, Kim OS, Molina V, Limburg P, Junier T, Imhoff JF, et al. Comparative in silico  
455 analysis of PCR primers suited for diagnostics and cloning of ammonia monooxygenase  
456 genes from ammonia-oxidizing bacteria. FEMS Microbiol Ecol. 2008; 64: 141-152.

457 Juretschko S, Timmermann G, Schmid M, Schleifer KH, Pommerening-Röser A, Koops HP,  
458 et al. Combined molecular and conventional analyses of nitrifying bacterium diversity in  
459 activated sludge: *Nitrosococcus mobilis* and *Nitrospira*-like bacteria as dominant populations.  
460 Appl Environ Microbiol. 1998; 64: 3042-3051.

461 Katoh K, Misawa K, Kuma KI, Miyata T. MAFFT: a novel method for rapid multiple sequence  
462 alignment based on fast Fourier transform. Nucleic Acids Res. 2002; 30: 3059-3066.

463 Ke X, Angel R, Lu Y, Conrad R. Niche differentiation of ammonia oxidizers and nitrite  
464 oxidizers in rice paddy soil. Environ Microbiol. 2013; 15: 2275-2292.

465 van Kessel MA, Speth DR, Albertsen M, Nielsen PH, den Camp HJO, Kartal B, et al.  
466 Complete nitrification by a single microorganism. Nature. 2015; 528: 555-559.

467 Koch H, Galushko A, Albertsen M, Schintlmeister A, Gruber-Dorninger C, Lüscher S, et al.  
468 Growth of nitrite-oxidizing bacteria by aerobic hydrogen oxidation. Science. 2014; 345: 1052-  
469 1054.

470 Koch H, Lücker S, Albertsen M, Kitzinger K, Herbold C, Spieck E, et al. Expanded metabolic  
471 versatility of ubiquitous nitrite-oxidizing bacteria from the genus *Nitrospira*. Proc Natl Acad Sci  
472 USA. 2015; 112: 11371-11376.

473 Könneke M, Bernhard AE, José R, Walker CB, Waterbury JB, Stahl DA. Isolation of an  
474 autotrophic ammonia-oxidizing marine archaeon. Nature. 2005; 437: 543-546.

475 Lebedeva EV, Alawi M, Maixner F, Jozsa PG, Daims H, Spieck E. Physiological and  
476 phylogenetic characterization of a novel lithoautotrophic nitrite-oxidizing bacterium,  
477 '*Candidatus Nitrospira bockiana*'. IJSEM. 2008; 58: 242-250.

478 Lebedeva EV, Off S, Zumbärgel S, Kruse M, Shagzhina A, Lücker S, et al. Isolation and  
479 characterization of a moderately thermophilic nitrite-oxidizing bacterium from a geothermal  
480 spring. FEMS Microbiol Ecol. 2011; 75: 195-204.

481 Leininger S, Urich T, Schlöter M, Schwark L, Qi J, Nicol GW, et al. Archaea predominate  
482 among ammonia-oxidizing prokaryotes in soils. Nature. 2006; 442: 806-809.

483 Linhart C, Shamir R. The degenerate primer design problem. Bioinformatics. 2002; 18:  
484 S172-S181.

485 Ludwig W, Strunk O, Westram R, Richter L, Meier H, Buchner A, et al. ARB: a software  
486 environment for sequence data. Nucleic Acids Res. 2004; 32: 1363-1371.

487 Luesken FA, van Alen TA, van der Biezen E, Frijters C, Toonen G, Kampman C, et al.  
488 Diversity and enrichment of nitrite-dependent anaerobic methane oxidizing bacteria from  
489 wastewater sludge. Appl Microbiol Biot. 2011; 92: 845-854.

490 Maixner F, Noguera DR, Anneser B, Stoecker K, Wegl G, Wagner M, et al. Nitrite  
491 concentration influences the population structure of *Nitrospira*-like bacteria. Environ  
492 Microbiol. 2006; 8: 1487-1495.

493 Martiny AC, Albrechtsen HJ, Arvin E, Molin S. Identification of bacteria in biofilm and bulk  
494 water samples from a nonchlorinated model drinking water distribution system: detection of a

495 large nitrite-oxidizing population associated with *Nitrospira* spp. Appl Environ Microbiol.  
496 2005; 71: 8611-8617.

497 Meinhardt KA, Bertagnolli A, Pannu MW, Strand SE, Brown SL, et al. Evaluation of revised  
498 polymerase chain reaction primers for more inclusive quantification of ammonia-oxidizing  
499 archaea and bacteria. Environ Microbiol Rep. 2015; 7: 354-363.

500 Mincer TJ, Church MJ, Taylor LT, Preston C, Karl DM, DeLong EF. Quantitative distribution  
501 of presumptive archaeal and bacterial nitrifiers in Monterey Bay and the North Pacific  
502 Subtropical Gyre. Environ Microbiol. 2007; 9: 1162-1175.

503 Mußmann M, Brito I, Pitcher A, Damsté JSS, Hatzenpichler R, Richter A, et al.  
504 Thaumarchaeotes abundant in refinery nitrifying sludges express *amoA* but are not obligate  
505 autotrophic ammonia oxidizers. Proc Nat Acad Sci USA. 2011; 108: 16771-16776.

506 Nold SC, Zhou J, Devol AH, Tiedje JM. Pacific Northwest Marine Sediments Contain  
507 Ammonia-Oxidizing Bacteria in the  $\beta$  Subdivision of the *Proteobacteria*. Appl Environ  
508 Microbiol. 2000; 66: 4532-4535.

509 Norton JM, Alzerreca JJ, Suwa Y, Klotz MG. Diversity of ammonia monooxygenase operon  
510 in autotrophic ammonia-oxidizing bacteria. Arch Microbiol. 2002; 177: 139-149.

511 Okano Y, Hristova KR, Leutenegger CM, Jackson LE, Denison RF, Gebreyesus B, et al.  
512 Application of real-time PCR to study effects of ammonium on population size of ammonia-  
513 oxidizing bacteria in soil. Appl Environ Microbiol. 2004; 70: 1008-1016.

514 Oswald K, Graf JS, Littmann S, Tieken D, Brand A, Wehrli B, et al. *Crenothrix* are major  
515 methane consumers in stratified lakes. Under revision in ISMEJ.

516 Palomo A, Fowler SJ, Gülay A, Rasmussen S, Sicheritz-Ponten T, Smets BF. Metagenomic  
517 analysis of rapid gravity sand filter microbial communities suggests novel physiology of  
518 *Nitrospira* spp. ISMEJ. 2016; 10:2569-258.

519 Pester M, Rattei T, Flechl S, Gröngroft A, Richter A, Overmann J, et al. *amoA*-based  
520 consensus phylogeny of ammonia-oxidizing archaea and deep sequencing of *amoA* genes  
521 from soils of four different geographic regions. *Environ Microbiol.* 2012; 14: 525-539.

522 Pester M, Maixner F, Berry D, Rattei T, Koch H, Lückner S, et al. NxrB encoding the beta  
523 subunit of nitrite oxidoreductase as functional and phylogenetic marker for nitrite-oxidizing  
524 *Nitrospira*. *Environ Microbiol.* 2014; 16: 3055-3071.

525 Pinto AJ, Marcus DN, Ijaz UZ, Bautista-de Iose Santos QM, Dick GJ, Raskin L.  
526 Metagenomic evidence for the presence of comammox *Nitrospira*-like bacteria in a drinking  
527 water system. *mSphere.* 2016; 1: e00054-15.

528 Polz MF, Cavanaugh CM. Bias in template-to-product ratios in multitemplate PCR. *Appl*  
529 *Environ Microbiol.* 1998; 64: 3724-3730.

530 Price MN, Dehal PS, Arkin AP. FastTree: computing large minimum evolution trees with  
531 profiles instead of a distance matrix. *Mol Biol Evol.* 2009; 26: 1641-1650.

532 Purkhold U, Pommerening-Röser A, Juretschko S, Schmid MC, Koops HP, Wagner, M.  
533 Phylogeny of all recognized species of ammonia oxidizers based on comparative 16S rRNA  
534 and *amoA* sequence analysis: implications for molecular diversity surveys. *Appl Environ*  
535 *Microbiol.* 2000; 66: 5368-5382.

536 Richter M, Rosselló-Móra R. Shifting the genomic gold standard for the prokaryotic species  
537 definition. *Proc Nat Acad Sci USA.* 2009; 106: 19126-19131.

538 Rotthauwe JH, Witzel KP, Liesack W. The ammonia monooxygenase structural gene *amoA*  
539 as a functional marker: molecular fine-scale analysis of natural ammonia-oxidizing  
540 populations. *Appl Environ Microbiol.* 1997; 63: 4704-4712.

541 Sinigalliano CD, Kuhn DN, Jones RD. Amplification of the *amoA* gene from diverse species  
542 of ammonium-oxidizing bacteria and from an indigenous bacterial population from seawater.  
543 *Appl Environ Microbiol.* 1995; 61: 2702-2706.

544 Spieck E, Hartwig C, McCormack I, Maixner F, Wagner M, Lipski A, et al. Selective  
545 enrichment and molecular characterization of a previously uncultured *Nitrospira*-like  
546 bacterium from activated sludge. *Environ Microbiol.* 2006; 8: 405-415.

547 Stamatakis A, Ludwig T, Meier H. RAXML-III: a fast program for maximum likelihood-based  
548 inference of large phylogenetic trees. *Bioinformatics.* 2005; 21: 456-463.

549 Stephen JR, Chang YJ, Macnaughton SJ, Kowalchuk GA, Leung KT, Flemming CA, White  
550 DC. Effect of toxic metals on indigenous soil  $\beta$ -subgroup proteobacterium ammonia oxidizer  
551 community structure and protection against toxicity by inoculated metal-resistant bacteria.  
552 *Appl Environ Microbiol.* 1999; 65: 95-101.

553 Stoecker K, Bendinger B, Schöning B, Nielsen PH, Nielsen JL, Baranyi C, et al. Cohn's  
554 *Crenothrix* is a filamentous methane oxidizer with an unusual methane monooxygenase.  
555 *Proc Nat Acad Sci USA.* 2006; 103: 2363-2367.

556 Treusch AH, Leininger S, Kletzin A, Schuster SC, Klenk HP, Schleper C. Novel genes for  
557 nitrite reductase and Amo-related proteins indicate a role of uncultivated mesophilic  
558 crenarchaeota in nitrogen cycling. *Environ Microbiol.* 2005; 7: 1985-1995.

559 Wang JG, Xia F, Zeleke J, Zou B, Rhee SK, Quan ZX. An improved protocol with a highly  
560 degenerate primer targeting copper-containing membrane-bound monooxygenase (CuMMO)  
561 genes for community analysis of methane-and ammonia-oxidizing bacteria. *FEMS Microbiol*  
562 *Ecol.* 2016; doi: 10.1093/femsec/fiw244

563 Watson SW, Bock E, Valois FW, Waterbury JB, Schlosser U. *Nitrospira marina* gen. nov. sp.  
564 nov.: a chemolithotrophic nitrite-oxidizing bacterium. *Arch Microbiol.* 1986; 144: 1-7.

565 Webster G, Embley TM, Prosser JI. Grassland management regimens reduce small-scale  
566 heterogeneity and species diversity of  $\beta$ -proteobacterial ammonia oxidizer populations. *Appl*  
567 *Environ Microbiol.* 2002; 68: 20-30.

568 **Table 1.** Comammox *amoA*-targeted primers designed in this study, and *in silico* evaluation  
569 of the primer coverage of the target clades in our comammox *amoA* reference sequence  
570 database.

| Target gene                                           | Primer name  | Primer sequence (5' – 3') | Amplicon size | Target group coverage <sup>1</sup> |
|-------------------------------------------------------|--------------|---------------------------|---------------|------------------------------------|
| Degenerate primer pairs                               |              |                           |               |                                    |
| Comammox <i>Nitrospira</i><br>clade A <i>amoA</i>     | comaA-244F   | TAYAAYTGGGTSAAYTA         | 415           | 93/98<br>(95%)                     |
|                                                       | comaA-659R   | ARATCATSGTGCTRTG          |               |                                    |
| Comammox <i>Nitrospira</i><br>clade B <i>amoA</i>     | comaB-244F   | TAYTTCTGGACRTTYTA         | 415           | 188/228<br>(83%)                   |
|                                                       | comaB-659R   | ARATCCARACDGTGTG          |               |                                    |
| Single oligonucleotides for equimolar primer mixtures |              |                           |               |                                    |
| Comammox <i>Nitrospira</i><br>clade A <i>amoA</i>     | comaA-244f_a | TACAACTGGGTGAACTA         | 415           | 93/98<br>(95%)                     |
|                                                       | comaA-244f_b | TATAACTGGGTGAACTA         |               |                                    |
|                                                       | comaA-244f_c | TACAATTGGGTGAACTA         |               |                                    |
|                                                       | comaA-244f_d | TACAACTGGGTCAACTA         |               |                                    |
|                                                       | comaA-244f_e | TACAACTGGGTCAATTA         |               |                                    |
|                                                       | comaA-244f_f | TATAACTGGGTCAATTA         |               |                                    |
|                                                       | comaA-659r_a | AGATCATGGTGCTATG          |               |                                    |
|                                                       | comaA-659r_b | AAATCATGGTGCTATG          |               |                                    |
|                                                       | comaA-659r_c | AGATCATGGTGCTGTG          |               |                                    |
|                                                       | comaA-659r_d | AAATCATGGTGCTGTG          |               |                                    |
|                                                       | comaA-659r_e | AGATCATCGTGCTGTG          |               |                                    |
|                                                       | comaA-659r_f | AAATCATCGTGCTGTG          |               |                                    |
| Comammox <i>Nitrospira</i><br>clade B <i>amoA</i>     | comaB-244f_a | TAYTTCTGGACGTTCTA         | 415           | 209/228<br>(92%)                   |
|                                                       | comaB-244f_b | TAYTTCTGGACATTCTA         |               |                                    |
|                                                       | comaB-244f_c | TACTTCTGGACTTTCTA         |               |                                    |
|                                                       | comaB-244f_d | TAYTTCTGGACGTTTTA         |               |                                    |
|                                                       | comaB-244f_e | TAYTTCTGGACATTTTA         |               |                                    |
|                                                       | comaB-244f_f | TACTTCTGGACCTTCTA         |               |                                    |
|                                                       | comaB-659r_a | ARATCCAGACGGTGTG          |               |                                    |
|                                                       | comaB-659r_b | ARATCCAAACGGTGTG          |               |                                    |
|                                                       | comaB-659r_c | ARATCCAGACAGTGTG          |               |                                    |
|                                                       | comaB-659r_d | ARATCCAAACAGTGTG          |               |                                    |
|                                                       | comaB-659r_e | AGATCCAGACTGTGTG          |               |                                    |
|                                                       | comaB-659r_f | AGATCCAAACAGTGTG          |               |                                    |

571 <sup>1</sup> Indicated are the number of comammox *amoA* sequences in the respective target clade that fully  
572 match the primers, the total number of sequences in this target clade, and the primer coverage in per  
573 cent.

574

**Table 2.** Environmental samples analyzed in this study, PCR amplification cycles, and numbers of cloned comammox *amoA* sequences and OTUs retrieved from each sample.

| Sample name                                                                     | ID  | Habitat type           | Gene amplified      | Amplification cycles | N <sub>clones</sub> | N <sub>OTUs</sub> |
|---------------------------------------------------------------------------------|-----|------------------------|---------------------|----------------------|---------------------|-------------------|
| Wolfenbüttel                                                                    | WB  | Engineered (GWW)       | Clade A <i>amoA</i> | 25                   | 24                  | 5                 |
|                                                                                 |     |                        | Clade B <i>amoA</i> | 25                   | 28 <sup>3</sup>     | 3                 |
| Friedrichshof                                                                   | FH  | Engineered (DWTP)      | Clade A <i>amoA</i> | 25                   | 23                  | 4                 |
|                                                                                 |     |                        | Clade B <i>amoA</i> | 25                   | 22 <sup>4</sup>     | 3                 |
| Spiekeroog                                                                      | SP  | Engineered (DWTP)      | Clade A <i>amoA</i> | 25                   | 22                  | 1                 |
|                                                                                 |     |                        | Clade B <i>amoA</i> | 25                   | 23                  | 2                 |
| Breehei <sup>1</sup>                                                            | BH  | Engineered (DWTP)      | Clade A <i>amoA</i> | 30                   | 10                  | 3                 |
|                                                                                 |     |                        | Clade B <i>amoA</i> | 30                   | 10                  | 3                 |
| Lieshout                                                                        | LS  | Engineered (WWTP)      | Clade A <i>amoA</i> | 30                   | 8                   | 2                 |
| VetMed                                                                          | VM  | Engineered (WWTP)      | Clade A <i>amoA</i> | 30                   | 20 <sup>3</sup>     | 4                 |
| Ingolstadt                                                                      | IS  | Engineered (WWTP)      | Clade A <i>amoA</i> | 30                   | 5                   | 1                 |
| Recirculating aquaculture system <sup>1</sup>                                   | RAS | Engineered             | Clade A <i>amoA</i> | 30                   | 7                   | 4                 |
|                                                                                 |     |                        | Clade B <i>amoA</i> | 30                   | 8                   | 3                 |
| Vercelli rice soil <sup>2</sup>                                                 | VS  | Rice paddy soil        | Clade A <i>amoA</i> | 35                   | 26                  | 7                 |
|                                                                                 |     |                        | Clade B <i>amoA</i> | 35                   | 41                  | 5                 |
| Vercelli rice rhizosphere                                                       | VR  | Rhizosphere            | Clade A <i>amoA</i> | 35                   | 31                  | 8                 |
|                                                                                 |     |                        | Clade B <i>amoA</i> | 35                   | 29                  | 6                 |
| Klausen-Leopoldsdorf                                                            | KLD | Forest soil            | Clade B <i>amoA</i> | 35                   | 60                  | 8                 |
| Herrensee <sup>1</sup>                                                          | HS  | Brackish lake sediment | Clade A <i>amoA</i> | 30                   | 10                  | 3                 |
| River Schwarza enrichment (inoculated with river biofilm and fed with ammonium) | RS  | Freshwater biofilm     | Clade A <i>amoA</i> | 35                   | 37                  | 2                 |

<sup>1</sup> Unspecific PCR products were obtained with the degenerate comammox *amoA* clade A targeted primers.

<sup>2</sup> Unspecific PCR products were obtained with the degenerate comammox *amoA* clade B targeted primers.

<sup>3</sup> One of the obtained sequences was classified as *pmoA* gene by phylogenetic analysis.

<sup>4</sup> One of the obtained sequences was classified as comammox *amoA* clade A gene by phylogenetic analysis.

584 **Table 3.** Copy numbers of comammox *amoA* genes in environmental samples as  
585 determined by qPCR analysis.

| Sample name          | Habitat type         | Gene amplified      | Copies /<br>ng DNA       |
|----------------------|----------------------|---------------------|--------------------------|
| Wolfenbüttel         | Engineered<br>(GWW)  | Clade A <i>amoA</i> | 1.1±0.2 x10 <sup>4</sup> |
|                      |                      | Clade B <i>amoA</i> | 2.5±0.2 x10 <sup>4</sup> |
| Friedrichshof        | Engineered<br>(DWTP) | Clade A <i>amoA</i> | 1.7±0.3 x10 <sup>3</sup> |
|                      |                      | Clade B <i>amoA</i> | 3.7±0.6 x10 <sup>3</sup> |
| VetMed               | Engineered<br>(WWTP) | Clade A <i>amoA</i> | 5.1±1.7 x10 <sup>2</sup> |
| Vercelli rice soil   | Rice paddy soil      | Clade A <i>amoA</i> | 4.6±1.0 x10 <sup>2</sup> |
|                      |                      | Clade B <i>amoA</i> | 4.0±0.5x10 <sup>2</sup>  |
| Klausen-Leopoldsdorf | Forest soil          | Clade B <i>amoA</i> | 3.9±1.0 x10 <sup>2</sup> |

586

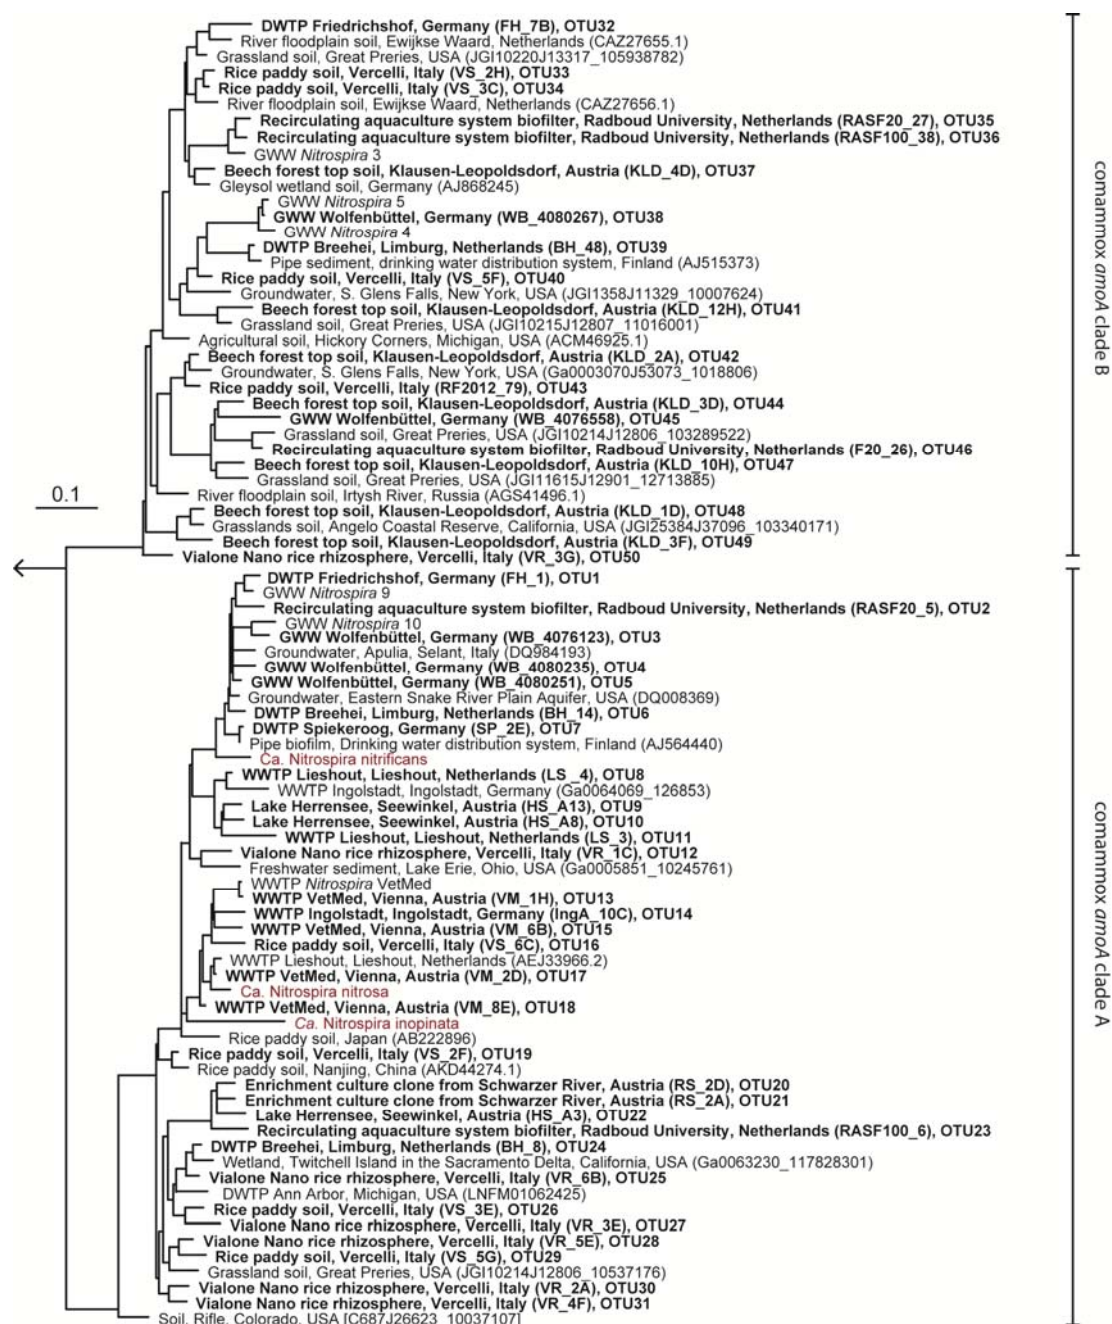

**Figure 1.** Maximum likelihood tree showing the phylogenetic affiliation of the comammox *amoA* genes obtained in this study (printed in boldface) to reference *amoA* sequences from comammox clades A and B. One representative sequence from each OTU is shown. Identifiers of clones (in parentheses) and of OTUs are indicated. Previously described comammox *Nitrospira* strains are shown in red. The outgroup consisted of selected betaproteobacterial *amoA* and proteobacterial *pmoA* genes. The scale bar indicates estimated change per nucleotide.
